# Supplementary material
Source: Springer Nature journal article supplement (https://www.springermedizin.de/resource/supplementary/12984_2012_406_MOESM2_ESM.pdf/9605942)

**No Load****With Load****ND Arm****D Arm****ND Arm****D Arm****a****b****e****f****c****d****g****h**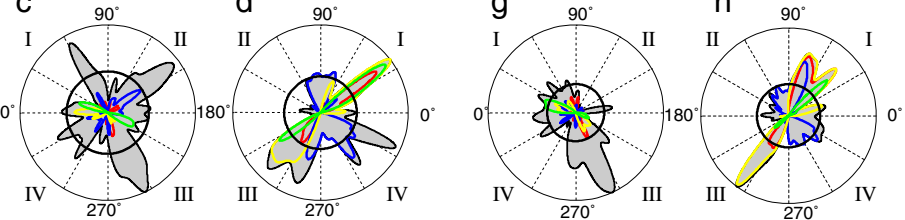

Supplement: MOESM2 [file 9605942]
